# Supplementary material for: A novel self-lipid antigen targets human T cells against CD1c+ leukemias
Source: PubMed Central journal article supplement — J Exp Med. 2014 Jun 30;211(7):1363–77. doi: 10.1084/jem.20140410 (PMC4076585; doi:10.1084/jem.20140410), 2014-06-30
Supplement: supp_jem.20140410_JEM_20140410_sm.pdf [file supp_jem.20140410_JEM_20140410_sm.pdf]

## SUPPLEMENTAL MATERIAL

Lepore et al., <http://www.jem.org/cgi/content/full/jem.20140410/DC1>**Table S1.** Clinical characteristics of pediatric patients

| Patient                | Gender/age<br><i>yr</i> | Malignancy | Risk | Blast CD1 expression |
|------------------------|-------------------------|------------|------|----------------------|
| <b>Pediatric AML</b>   |                         |            |      |                      |
| p-AML-01               | M/15                    | AML        | H    | CD1b-CD1c            |
| p-AML-02               | M/15                    | sAML MD    | H    | CD1b-CD1c            |
| p-AML-03               | F/12                    | AML        | H    | CD1b-CD1c            |
| p-AML-04               | M/18                    | AML        | L    | CD1b-CD1c            |
| p-AML-05               | F/8                     | AML        | L    | Negative             |
| p-AML-06               | F/18                    | AML        | H    | Negative             |
| p-AML-07               | F/2                     | sAML MD    | H    | Negative             |
| p-AML-08               | F/1                     | AML        | H    | Negative             |
| p-AML-09               | F/7                     | AML        | H    | Negative             |
| <b>Pediatric B-ALL</b> |                         |            |      |                      |
| p-BALL-01              | M/13                    | B-ALL      | I    | CD1c-CD1d            |
| p-BALL-02              | M/4                     | B-ALL      | H    | CD1b-CD1c            |
| p-BALL-03              | M/5                     | B-ALL      | I    | Negative             |
| p-BALL-04              | F/6                     | B-ALL      | H    | Negative             |
| p-BALL-05              | F/2                     | B-ALL      | S    | Negative             |
| p-BALL-06              | F/13                    | B-ALL      | S    | Negative             |
| p-BALL-07              | F/2                     | B-ALL      | I    | Negative             |
| p-BALL-08              | M/8                     | B-ALL      | H    | CD1b-CD1c            |
| p-BALL-09              | M/7                     | B-ALL      | H    | Negative             |
| p-BALL-10              | F/8                     | B-ALL      | S    | Negative             |
| p-BALL-11              | F/9                     | B-ALL      | S    | Negative             |
| p-BALL-12              | M/16                    | B-ALL      | H    | Negative             |
| p-BALL-13              | F/6                     | B-ALL      | S    | Negative             |
| p-BALL-14              | M/-                     | B-ALL      | I    | CD1b-CD1c            |
| p-BALL-15              | M/7                     | B-ALL      | S    | Negative             |
| p-BALL-16              | F/4                     | B-ALL      | H    | CD1c                 |
| p-BALL-17              | F/4                     | B-ALL      | I    | Negative             |
| p-BALL-18              | F/3                     | B-ALL      | I    | Negative             |
| p-BALL-19              | M/3                     | B-ALL      | S    | Negative             |
| p-BALL-20              | F/-                     | B-ALL      | n.e. | CD1a-CD1b            |
| p-BALL-21              | M/9                     | B-ALL      | S    | Negative             |
| p-BALL-22              | F/13                    | B-ALL      | I    | Negative             |
| p-BALL-23              | F/9                     | B-ALL      | I    | CD1b-CD1c            |
| <b>Pediatric T-ALL</b> |                         |            |      |                      |
| p-TALL-01              | M/5                     | T-ALL      | H    | CD1a-CD1b            |
| p-TALL-02              | M/14                    | T-ALL      | S    | CD1a-CD1b-CD1d       |
| p-TALL-03              | M/7                     | T-ALL      | H    | CD1a-CD1b            |
| p-TALL-04              | M/7                     | T-ALL      | S    | CD1a-CD1b-CD1d       |
| p-TALL-05              | M/7                     | T-ALL      | H    | CD1a-CD1b-CD1c-CD1d  |
| p-TALL-06              | M/13                    | T-ALL      | S    | CD1a-CD1b-CD1d       |
| p-TALL-07              | F/8                     | T-ALL      | H    | Negative             |
| p-TALL-08              | F/7                     | T-ALL      | H    | Negative             |

sAML MD, secondary AML from myelodysplastic syndrome. Disease risk: H, high risk; S, standard risk; I, intermediate risk; L, low risk; n.e., not evaluated.

**Table S2.** Clinical characteristics of adult patients

| Patient            | Gender/age<br>yr | Malignancy | Risk | Blast CD1 profile |
|--------------------|------------------|------------|------|-------------------|
| <b>Adult AML</b>   |                  |            |      |                   |
| a-AML-01           | M/39             | sAML       | A    | Negative          |
| a-AML-02           | M/56             | AML        | A    | CD1b-CD1c         |
| a-AML-03           | F/29             | AML        | A    | CD1b-CD1c         |
| a-AML-04           | F/54             | AML        | F    | CD1b-CD1c-CD1d    |
| a-AML-05           | F/64             | sAML MD    | A    | CD1b-CD1c-CD1d    |
| a-AML-06           | F/38             | AML        | I    | Negative          |
| a-AML-07           | F/59             | AML        | A    | CD1b-CD1c-CD1d    |
| a-AML-08           | F/64             | AML        | I    | CD1b-CD1c         |
| a-AML-09           | M/21             | sAML       | A    | CD1b-CD1c         |
| a-AML-10           | F/28             | sAML MD    | A    | CD1b-CD1c         |
| a-AML-11           | F/53             | AML        | A    | Negative          |
| a-AML-12           | F/53             | AML        | A    | CD1b-CD1c         |
| a-AML-13           | F/56             | AML        | A    | CD1b-CD1c-CD1d    |
| a-AML-14           | M/74             | AML        | I    | Negative          |
| a-AML-15           | M/64             | AML        | A    | Negative          |
| a-AML-16           | M/77             | AML        | A    | CD1b-CD1c         |
| a-AML-17           | F/62             | AML        | I    | Negative          |
| a-AML-18           | M/45             | AML        | A    | CD1b-CD1c         |
| a-AML-19           | F/59             | AML        | A    | None              |
| a-AML-20           | M/60             | sAML MD    | A    | CD1b-CD1c         |
| a-AML-21           | M/69             | AML        | F    | CD1a              |
| a-AML-22           | F/58             | sAML MD    | A    | Negative          |
| a-AML-23           | F/50             | AML        | F    | CD1d              |
| a-AML-24           | M/52             | AML        | A    | CD1d              |
| a-AML-25           | F/52             | AML        | A    | Negative          |
| a-AML-26           | F/84             | AML        | A    | CD1b              |
| a-AML-27           | F/70             | AML        | A    | Negative          |
| a-AML-28           | F/39             | AML        | A    | CD1b-CD1c-CD1d    |
| a-AML-29           | F/39             | AML        | A    | CD1b-CD1c-CD1d    |
| a-AML-30           | M/57             | AML        | F    | CD1b-CD1c         |
| a-AML-31           | M/42             | AML        | A    | Negative          |
| a-AML-32           | F/67             | AML        | A    | CD1b-CD1c         |
| a-AML-33           | F/61             | sAML       | A    | Negative          |
| <b>Adult B-ALL</b> |                  |            |      |                   |
| a-BALL-01          | M/61             | B-ALL      | VH   | Negative          |
| a-BALL-02          | M/78             | B-ALL      | VH   | CD1c              |
| a-BALL-03          | F/47             | B-ALL      | VH   | CD1c              |
| a-BALL-04          | M/22             | B-ALL      | n.e. | Negative          |
| a-BALL-05          | M/42             | B-ALL      | VH   | CD1c, CD1d        |
| a-BALL-06          | F/38             | B-ALL      | H    | CD1c, CD1d        |
| a-BALL-07          | F/78             | B-ALL      | VH   | CD1c              |

sAML MD, secondary AML from myelodysplastic syndrome. Disease risk for AML: A, adverse; I, intermediate; F, favorable. Disease risk for B-ALL: VH, very high risk; n.e., not evaluated.

**Table S3.** C16 and C17 mLPA MRM transitions

| Compound | Transition                   | Cone voltage | Collisional energy | Dwell time |
|----------|------------------------------|--------------|--------------------|------------|
|          |                              | V            | eV                 | s          |
| C16 mLPA | 408.96 > 110.84 <sup>a</sup> | 20           | 25                 | 0.025      |
|          | 408.96 > 376.97              | 20           | 35                 | 0.025      |
| C17 mLPA | 423.06 > 110.89 <sup>a</sup> | 20           | 25                 | 0.025      |
|          | 423.06 > 391.02              | 20           | 35                 | 0.025      |

<sup>a</sup>Quantification ion.
